# Supplementary material for: Mitochondrial defects caused by PARL deficiency lead to arrested spermatogenesis and ferroptosis
Source: PubMed Central journal article supplement (PMC10519710; doi:10.7554/elife.84710), 2023-07-28

Figure 7-figure supplement 2-source data 2

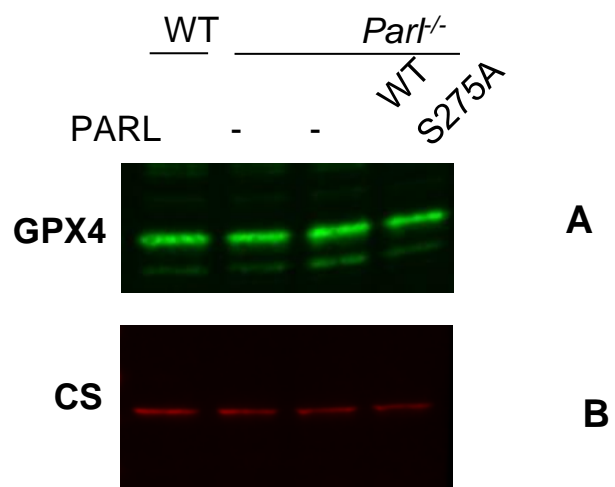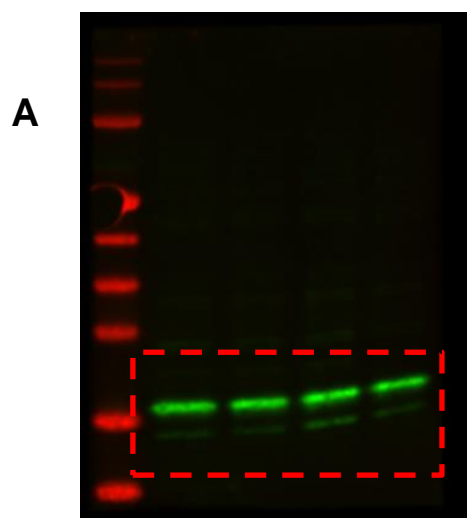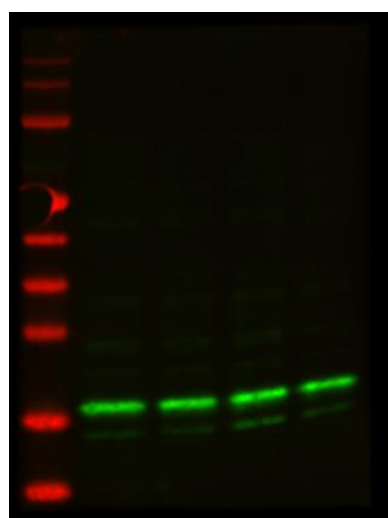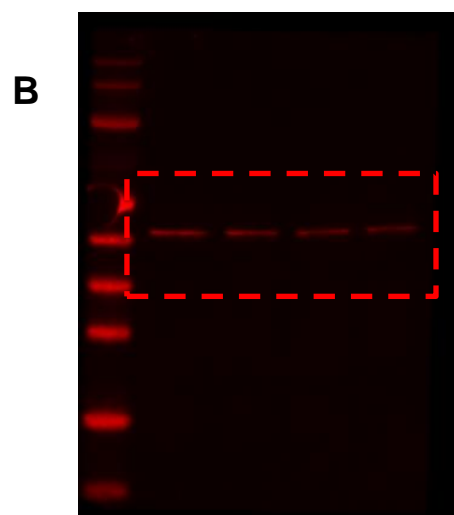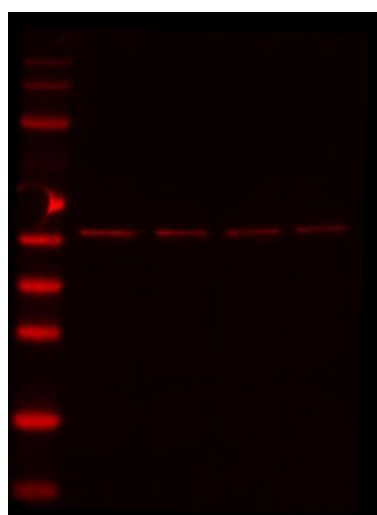

Supplement: elife-84710-fig7-figsupp2-data2.pdf [file elife-84710-fig7-figsupp2-data2.pdf]
