# Supplementary material for: Mitochondrial defects caused by PARL deficiency lead to arrested spermatogenesis and ferroptosis
Source: eLife journal article supplement (doi:10.7554/elife.84710), 2023-07-24

Figure 6—source data 1

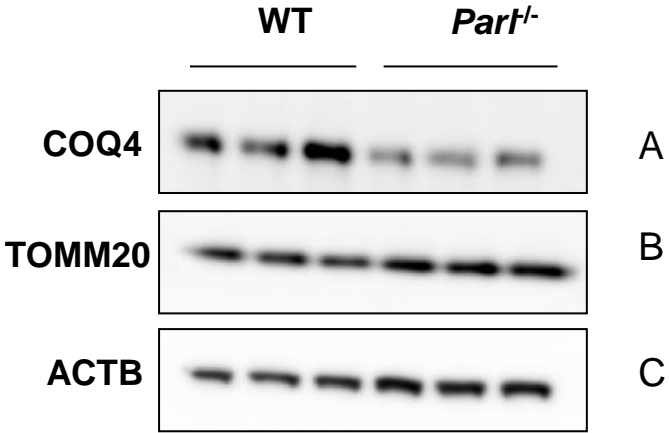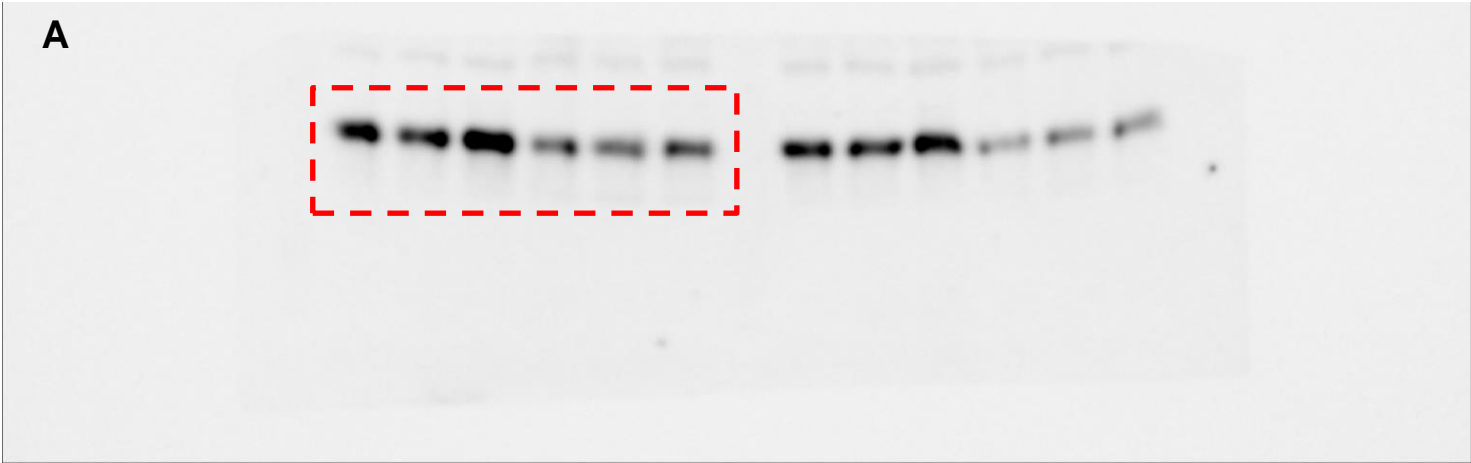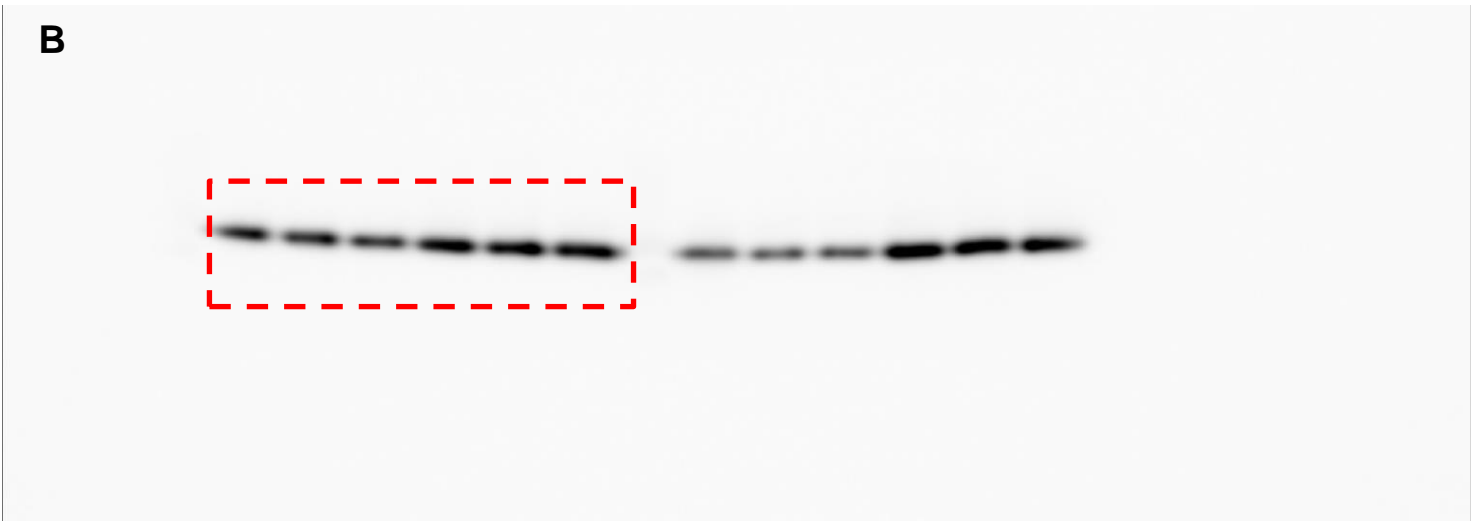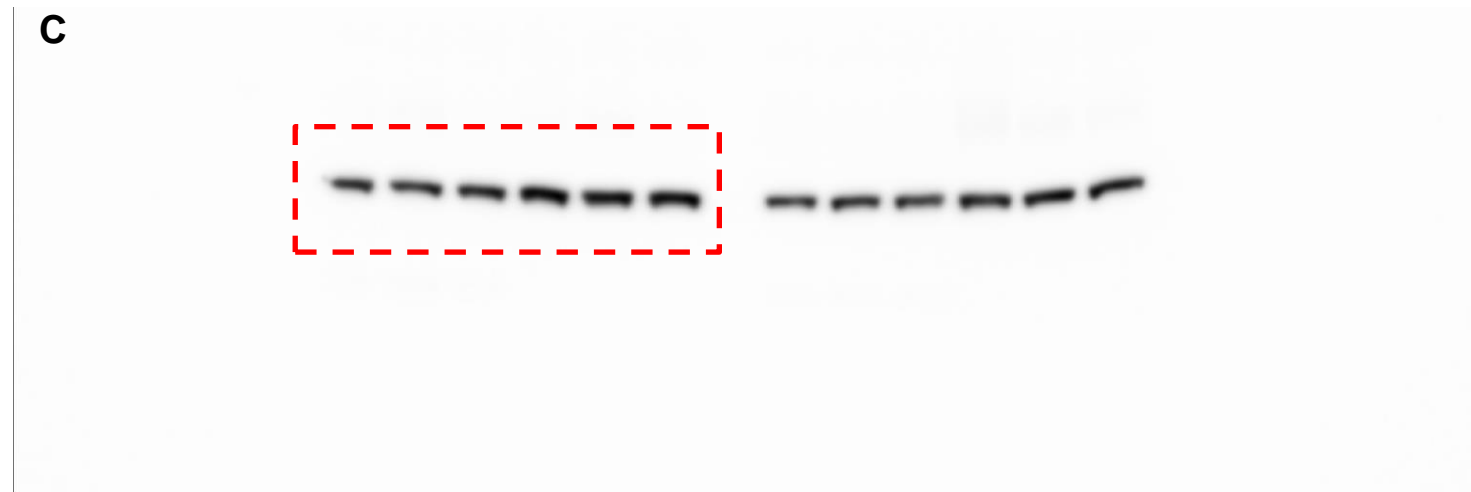

**A**

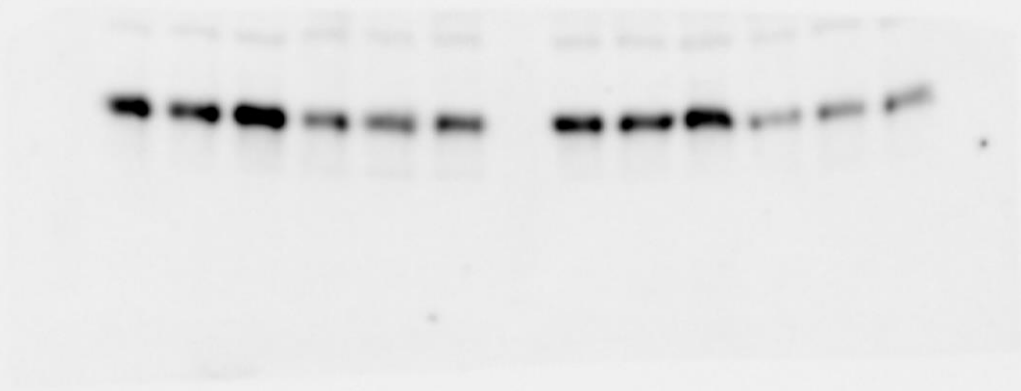

**B**

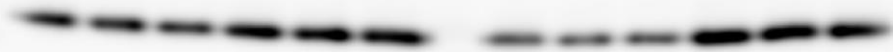

**C**

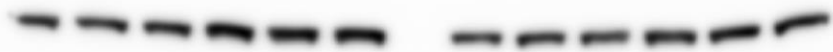

Supplement: fig6-data1 [file elife-84710-fig6-data1-v3.pdf]
