# Supplementary material for: Mitochondrial defects caused by PARL deficiency lead to arrested spermatogenesis and ferroptosis
Source: eLife journal article supplement (doi:10.7554/elife.84710), 2023-07-24

Figure 7—source data 2

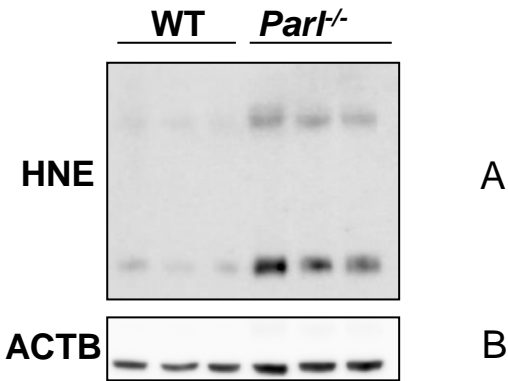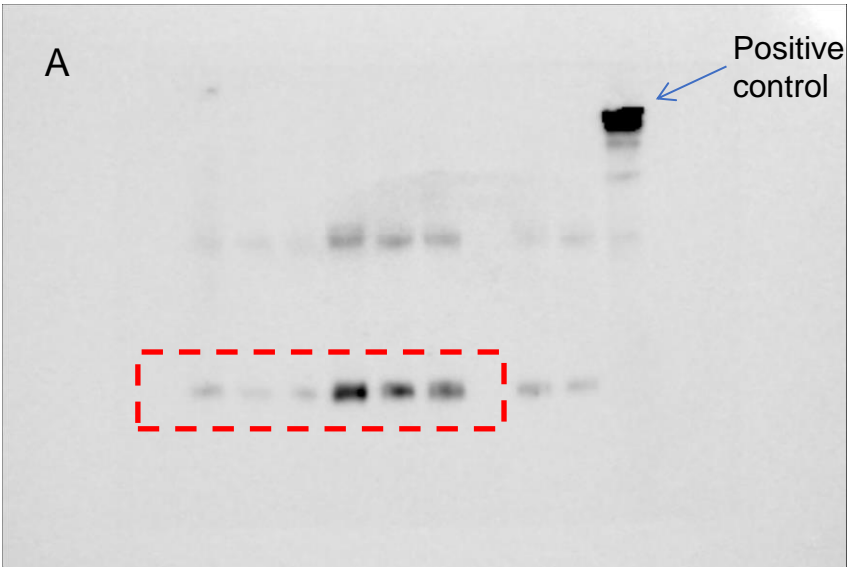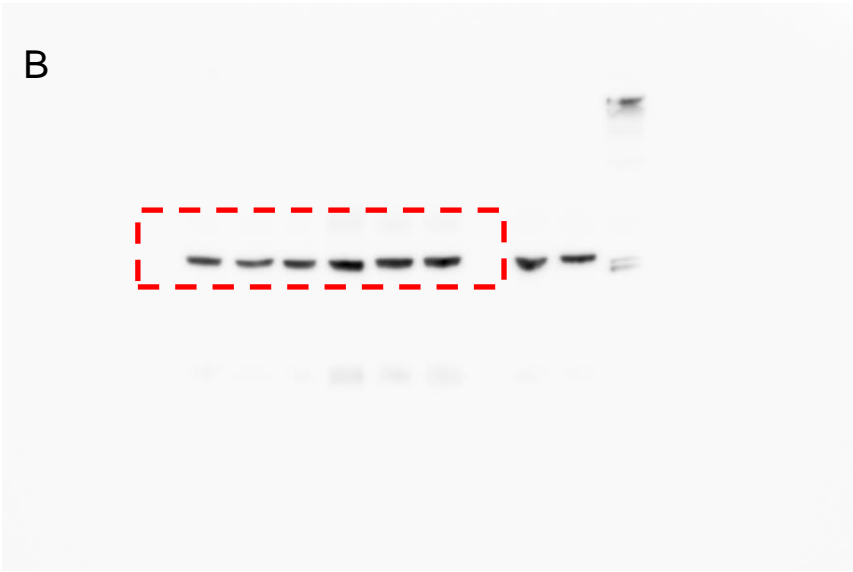

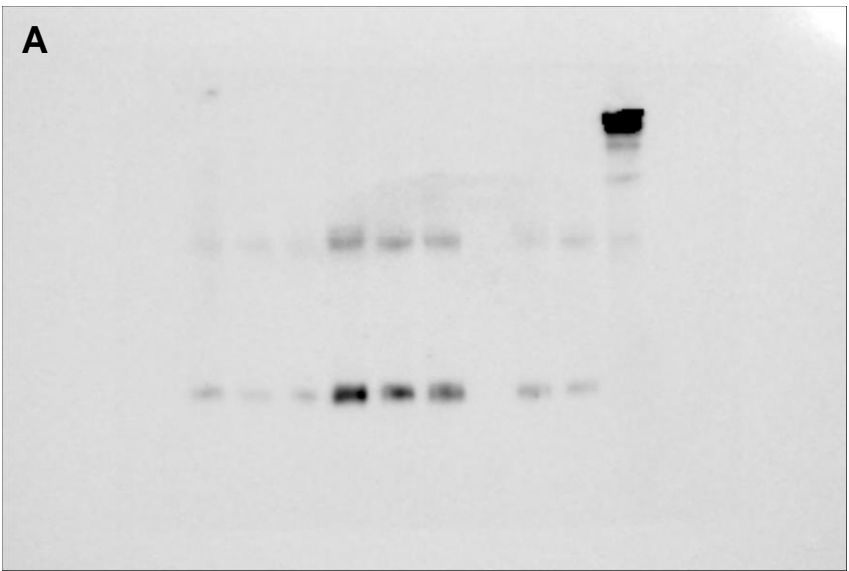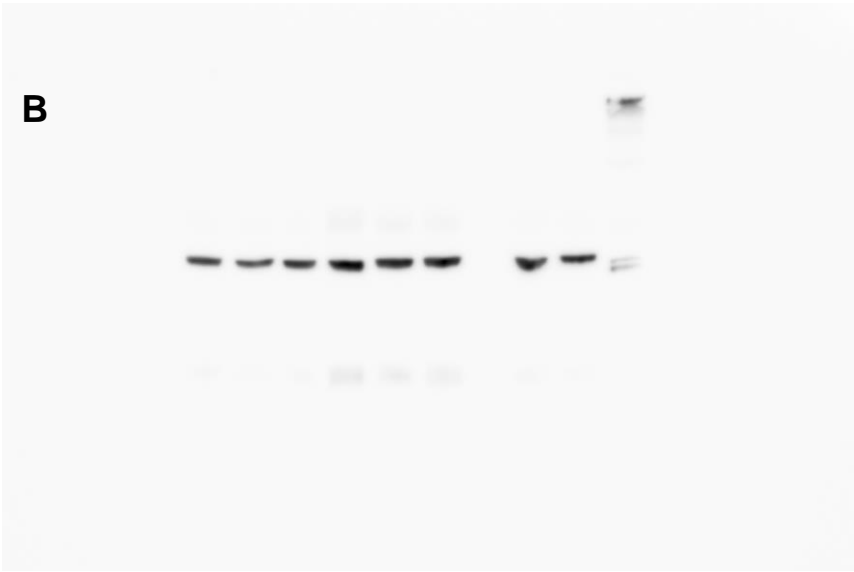

Supplement: fig7-data2 [file elife-84710-fig7-data2-v2.pdf]
