# Supplementary material for: Mitochondrial defects caused by PARL deficiency lead to arrested spermatogenesis and ferroptosis
Source: eLife journal article supplement (doi:10.7554/elife.84710), 2023-07-24

**Figure 3A-source data**

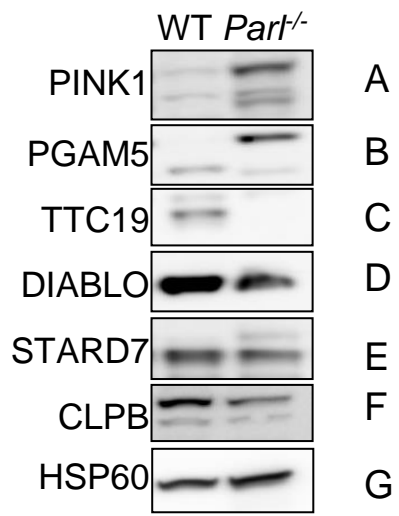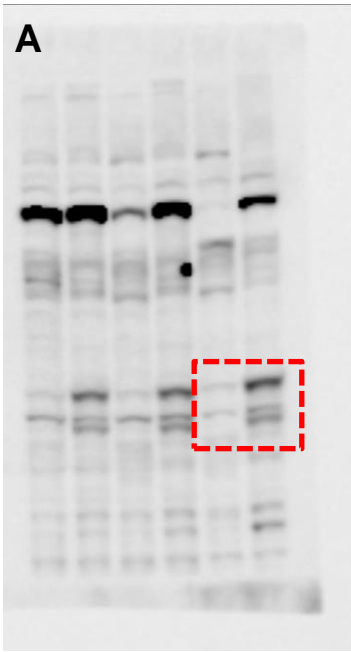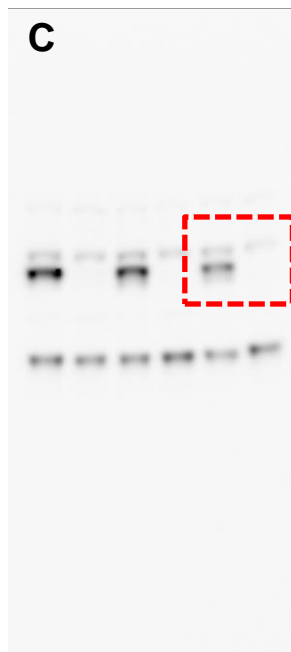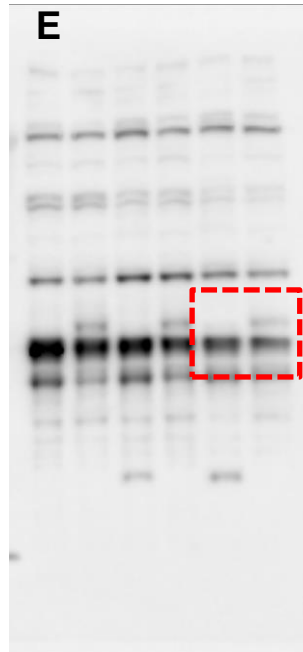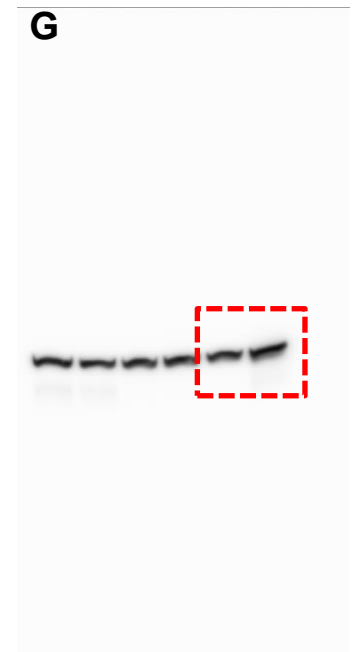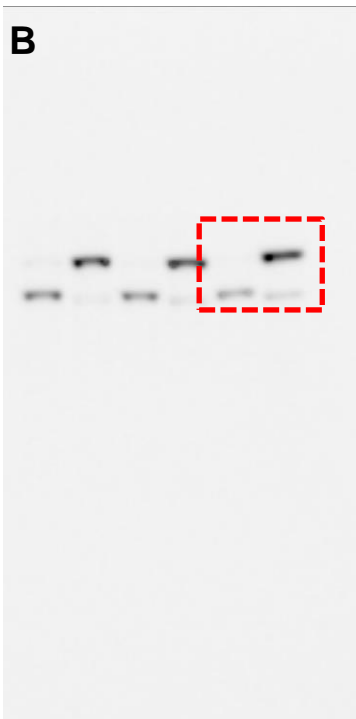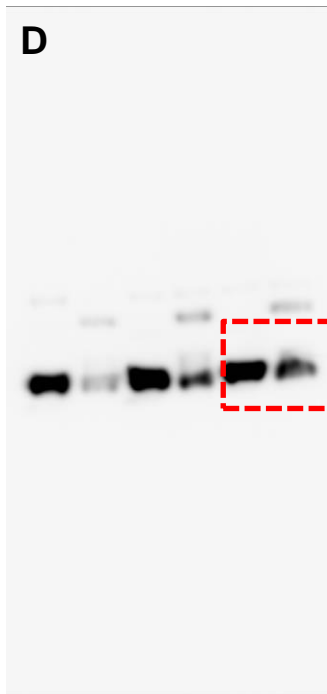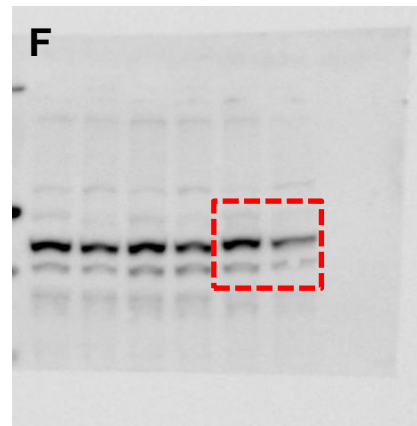

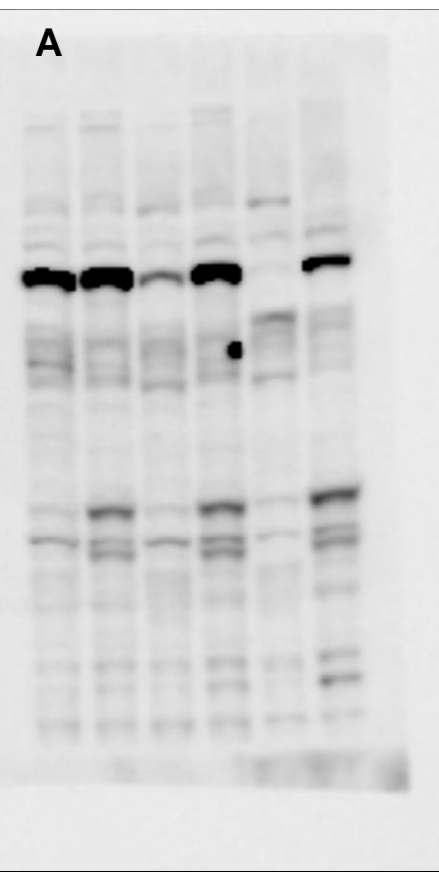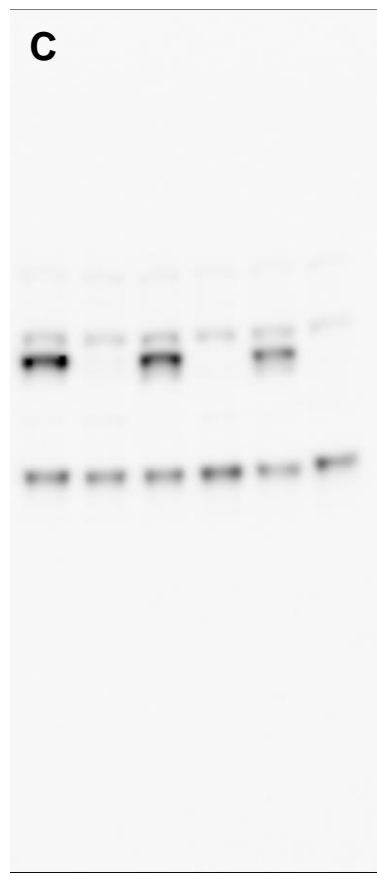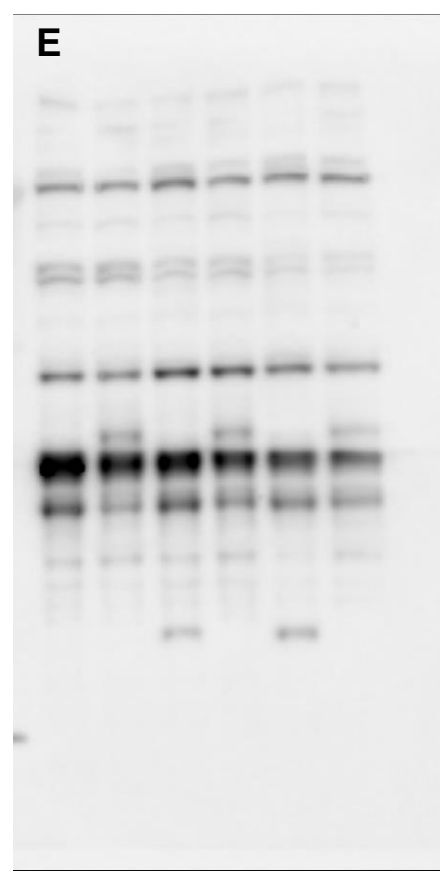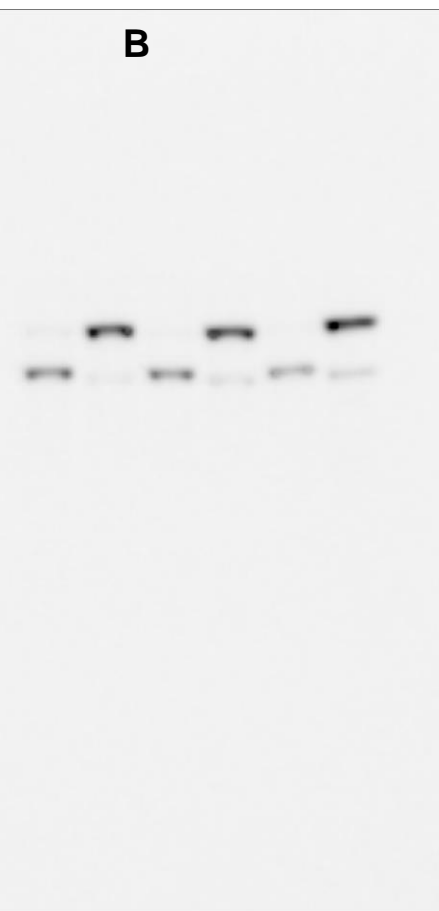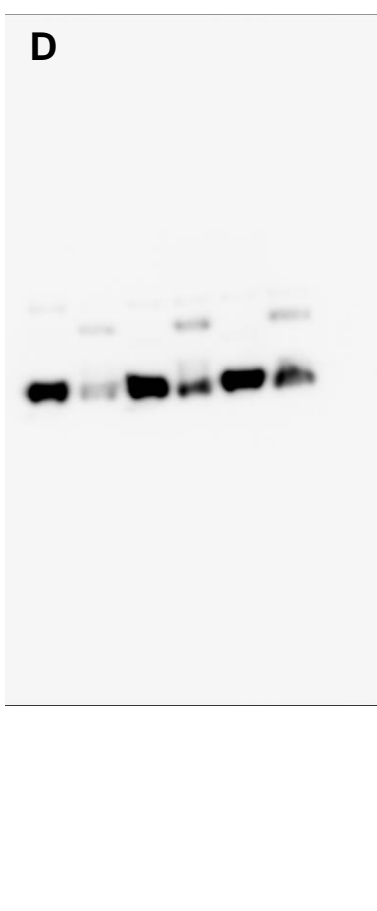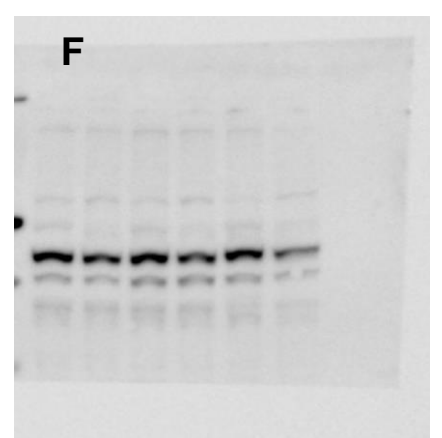

**G**

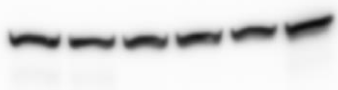

Supplement: supp [file elife-84710-supp-v1.zip]
