# Supplementary figures and images for: Mitochondrial defects caused by PARL deficiency lead to arrested spermatogenesis and ferroptosis
Source: eLife journal article supplement (doi:10.7554/elife.84710), 2023-07-24

Figure 6-figure supplement 3-source data 3

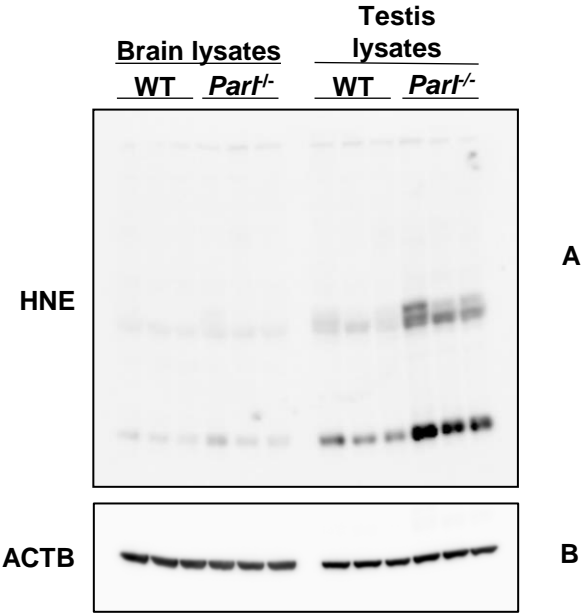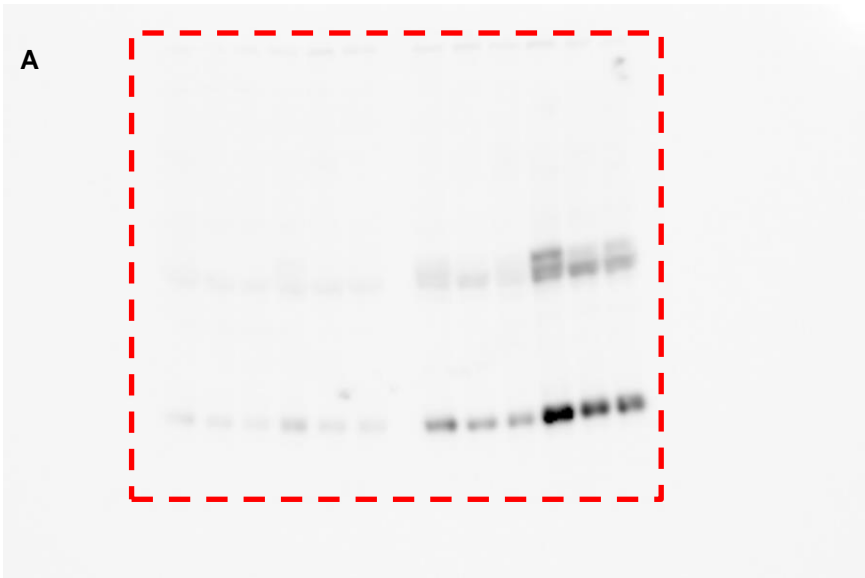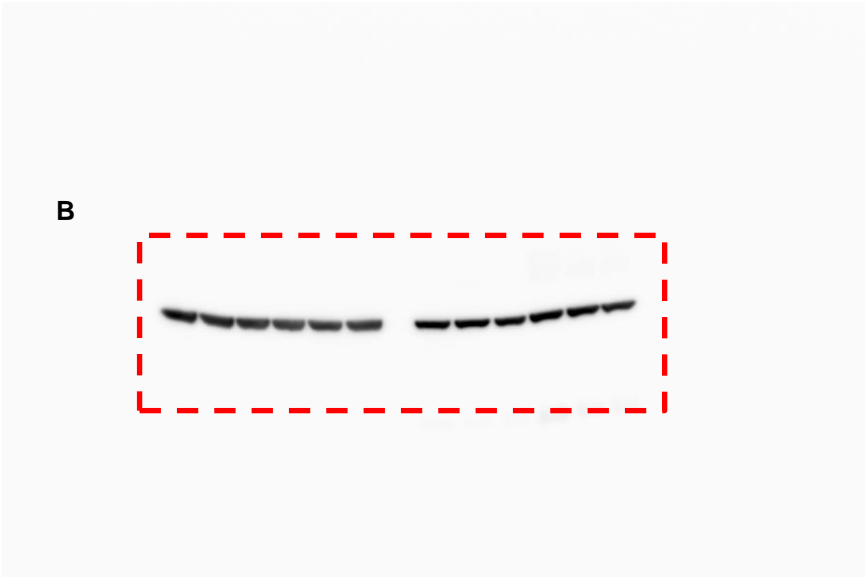

**A**

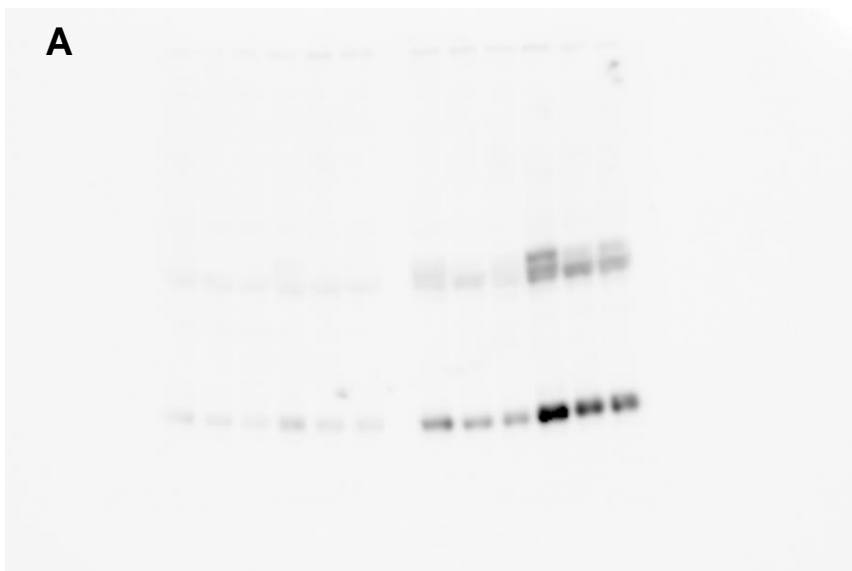

**B**

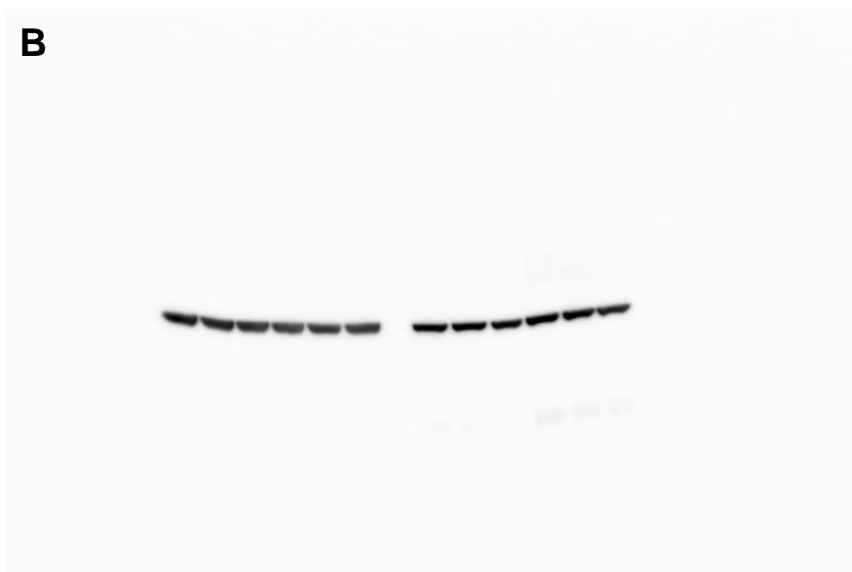

Supplement: supp [file elife-84710-supp-v1.zip]

Figure 6-figure supplement 3-source data 1

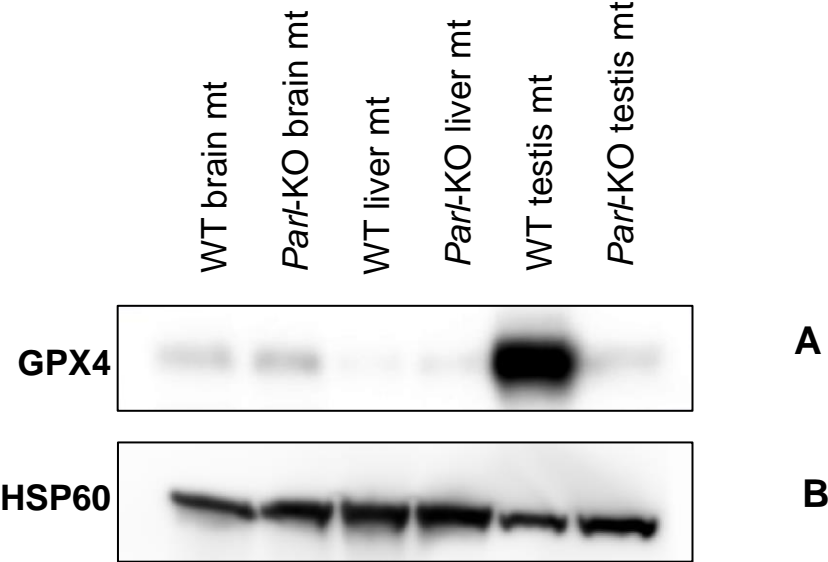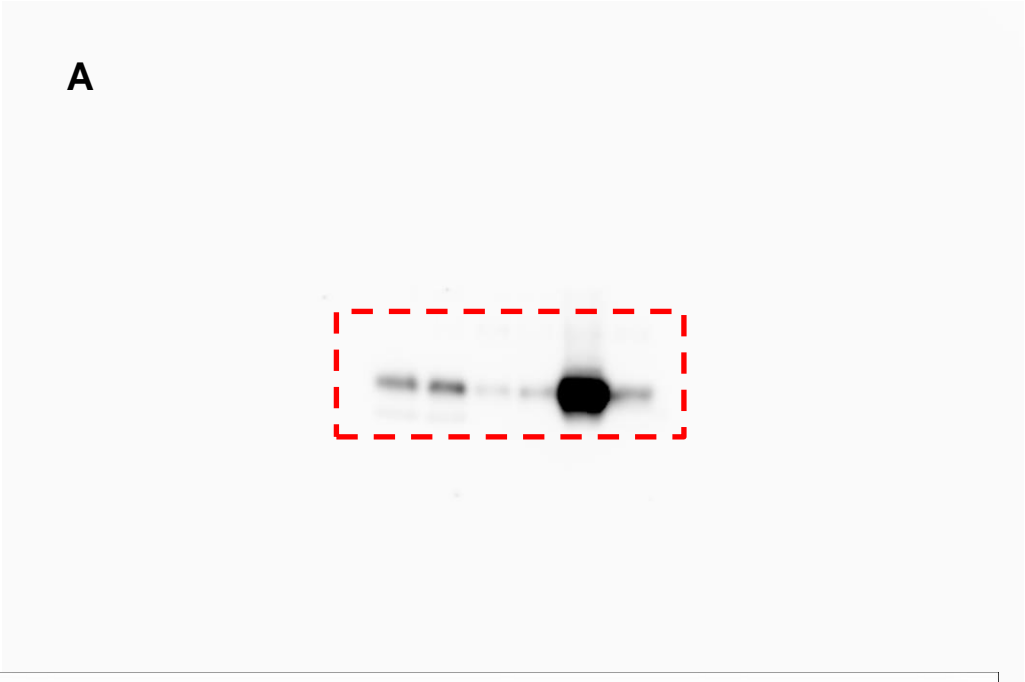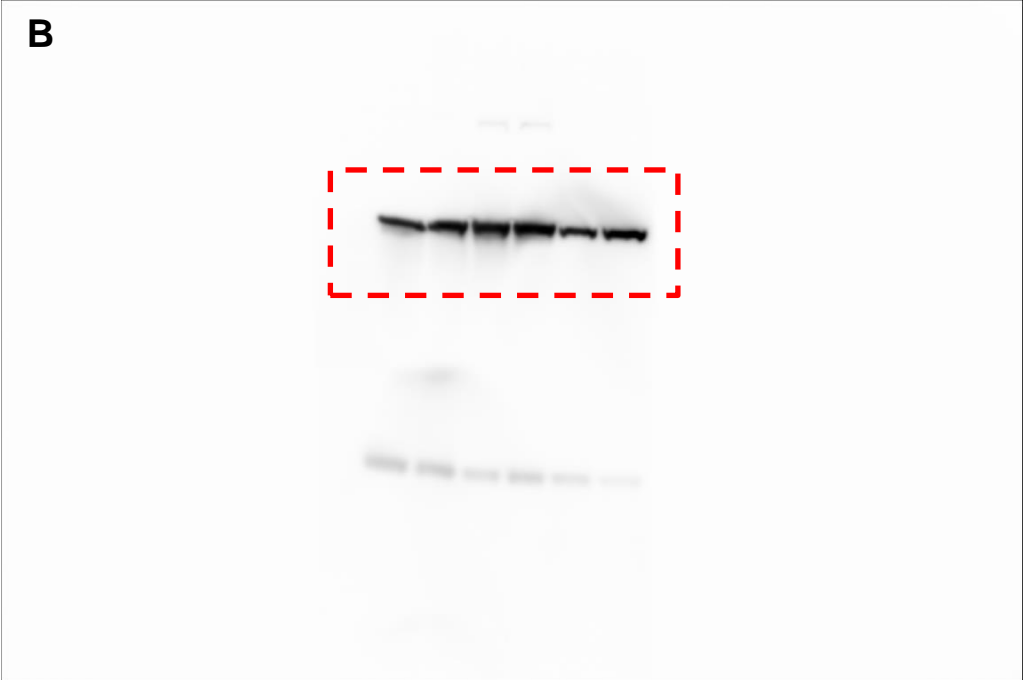

**A**

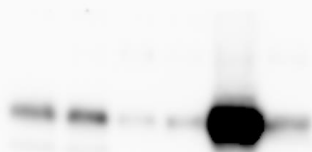

**B**

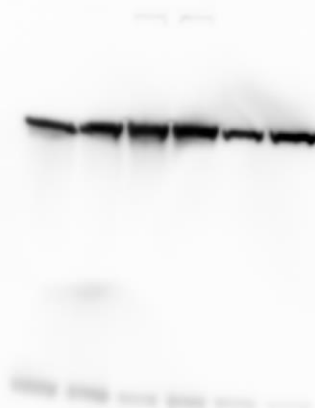

Supplement: supp [file elife-84710-supp-v1.zip]

Figure 6-figure supplement 4-source data 1

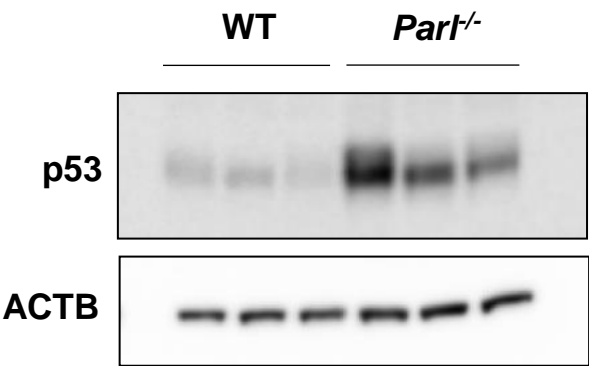

A

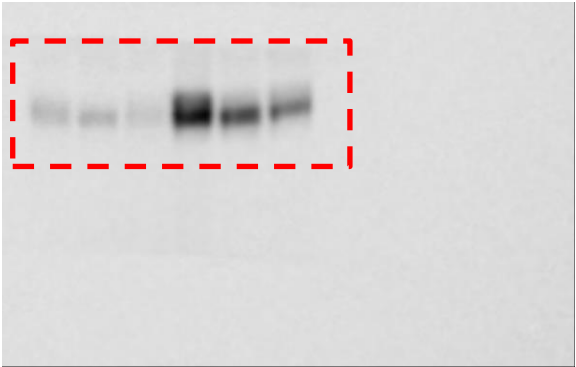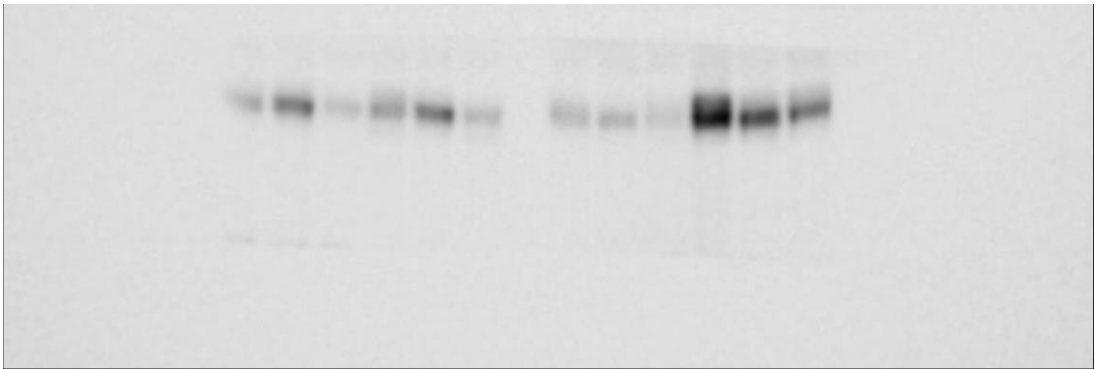

B

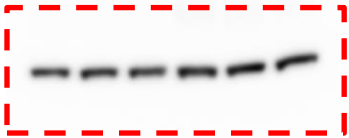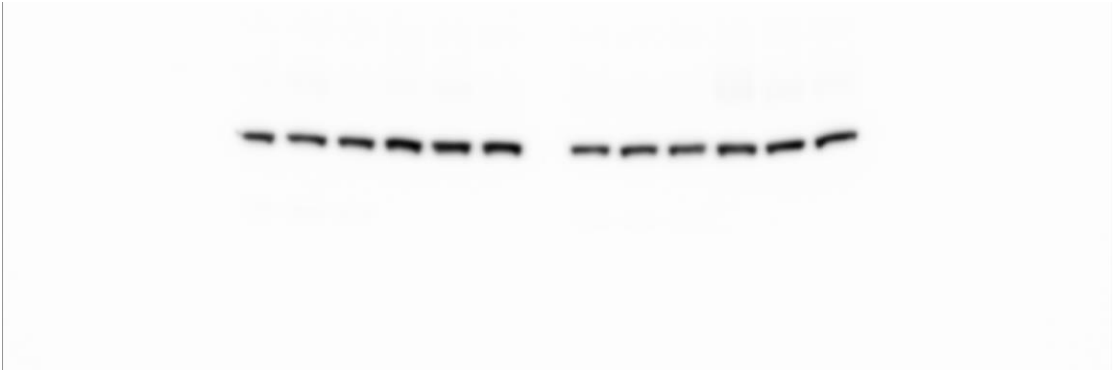

Supplement: supp [file elife-84710-supp-v1.zip]

Figure 6—source data 2

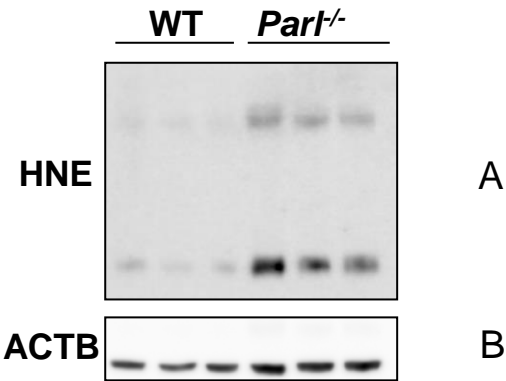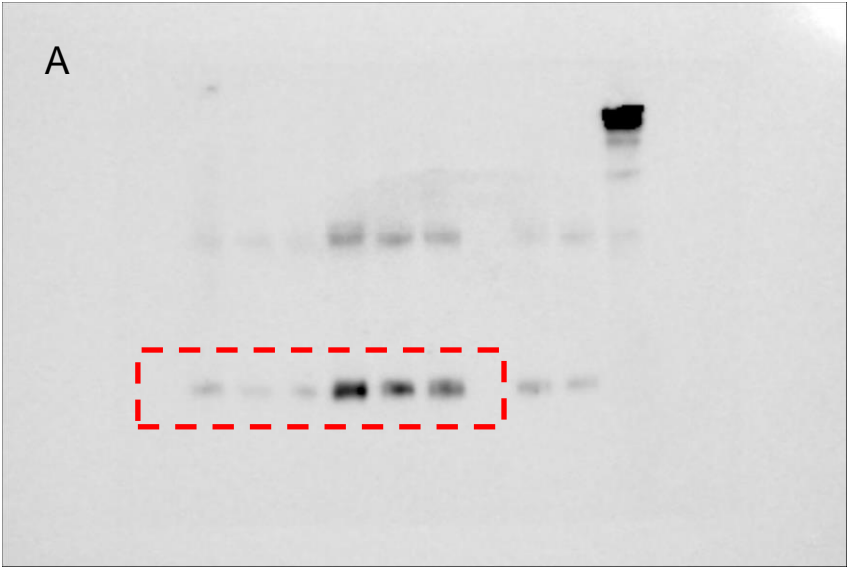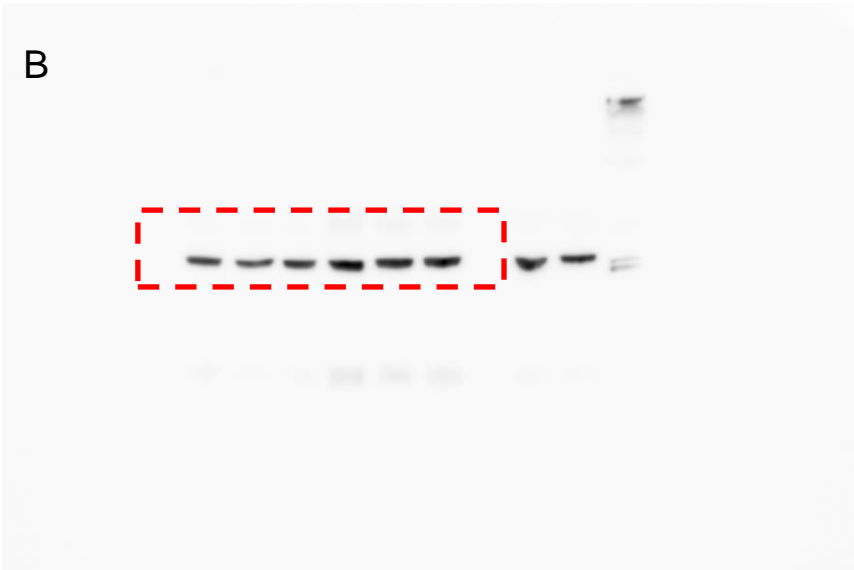

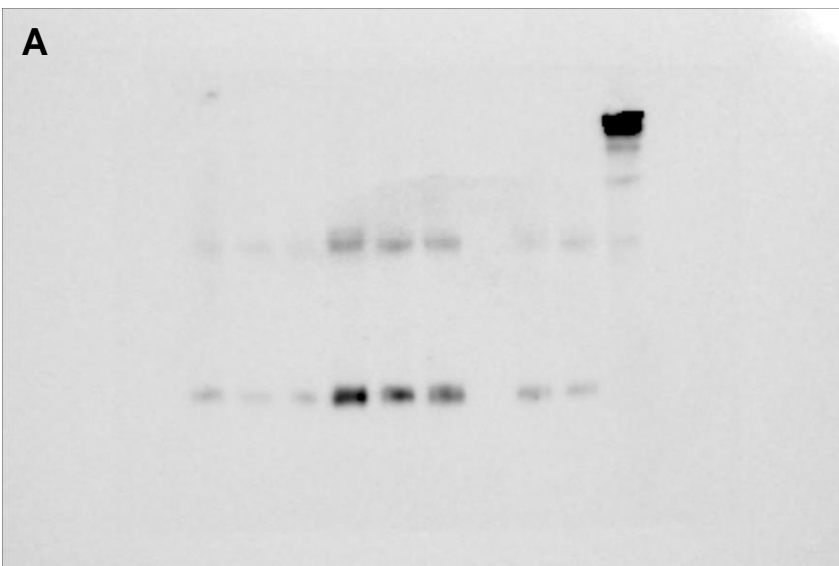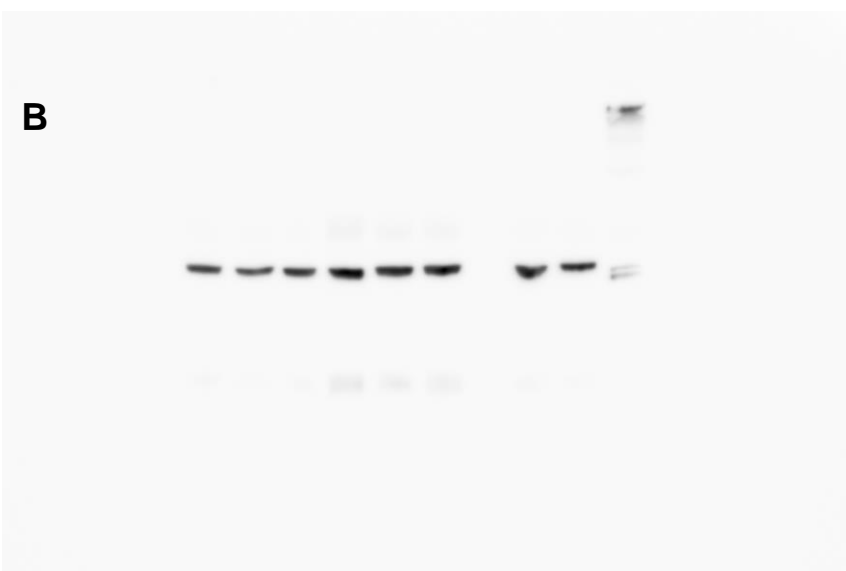

Supplement: supp [file elife-84710-supp-v1.zip]

Figure 6-figure supplement 3-source data 2

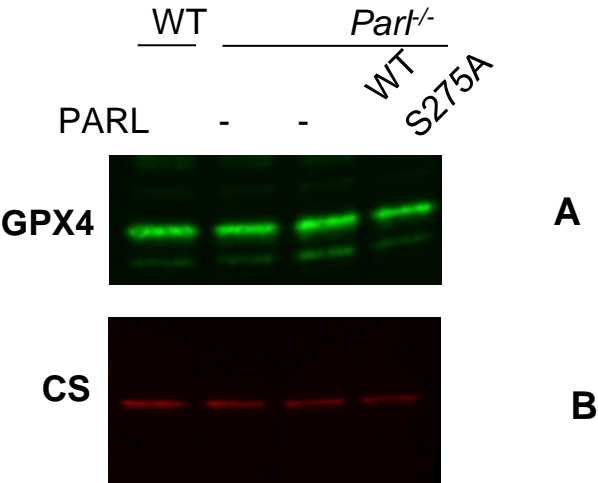

**A**

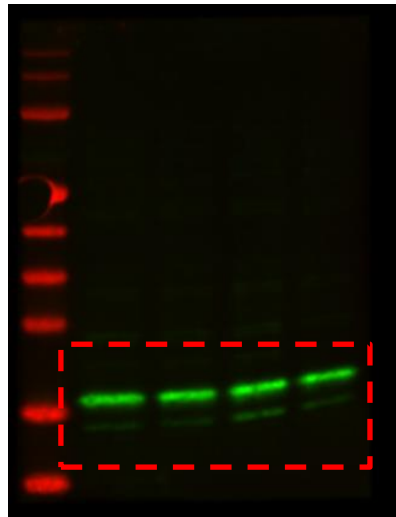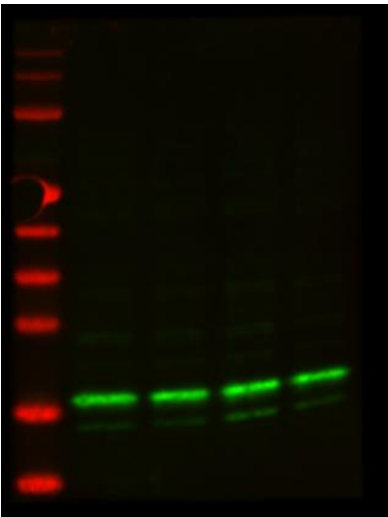

**B**

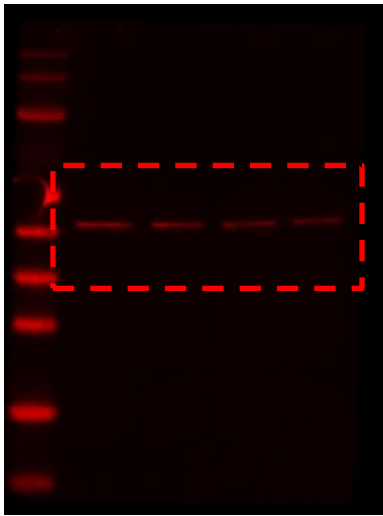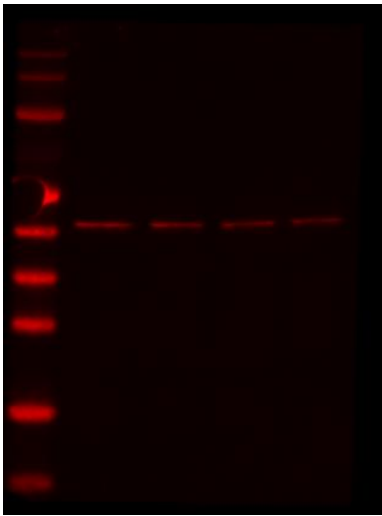

Supplement: supp [file elife-84710-supp-v1.zip]

Figure 5—source data 1

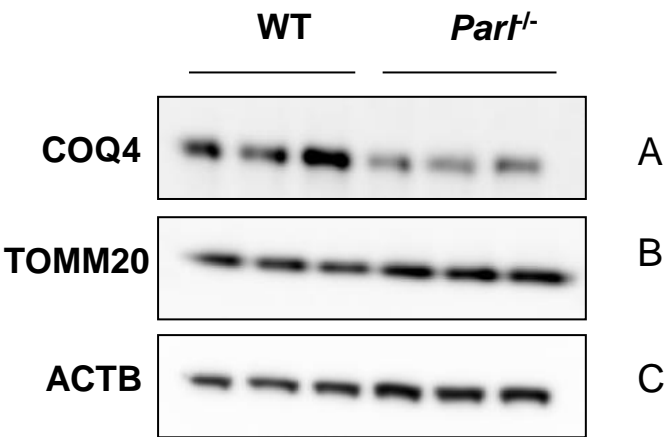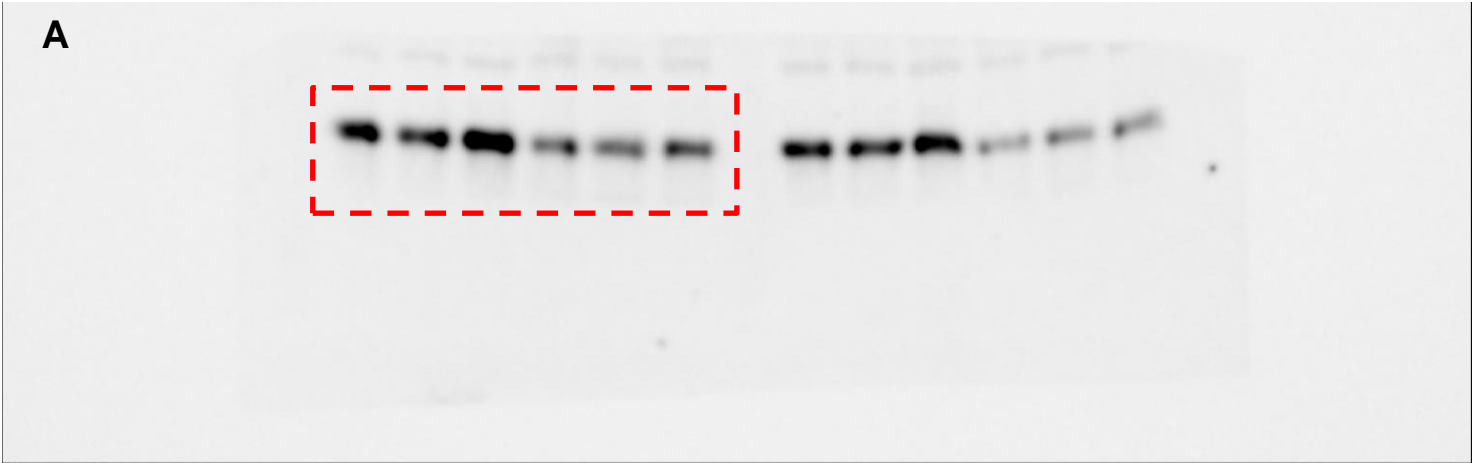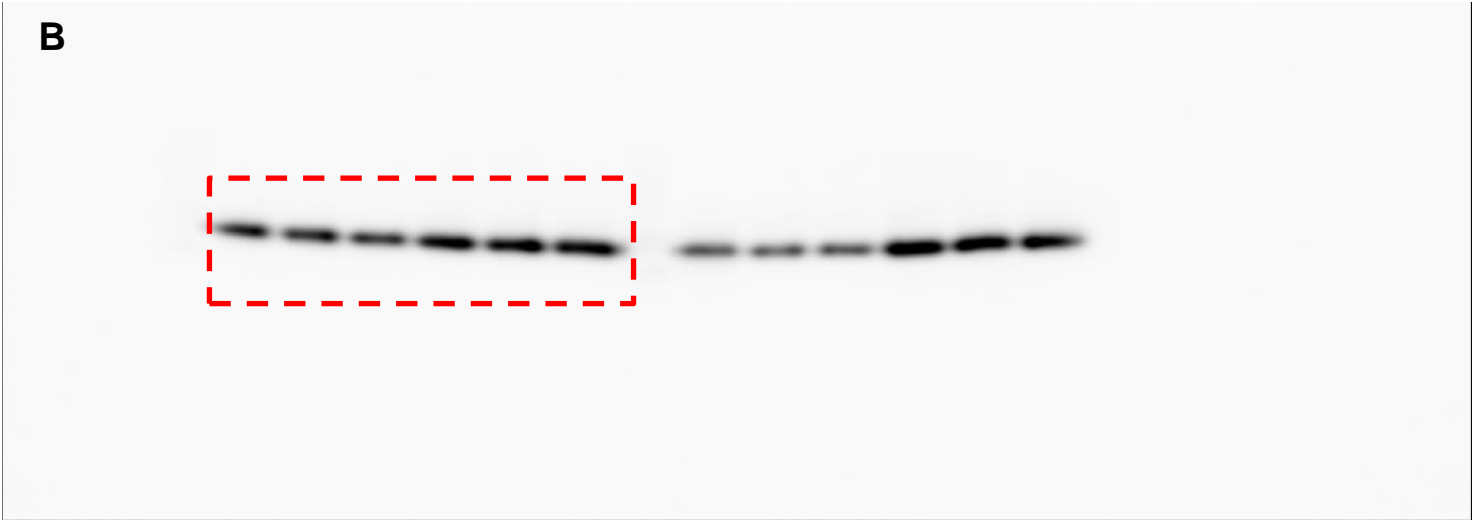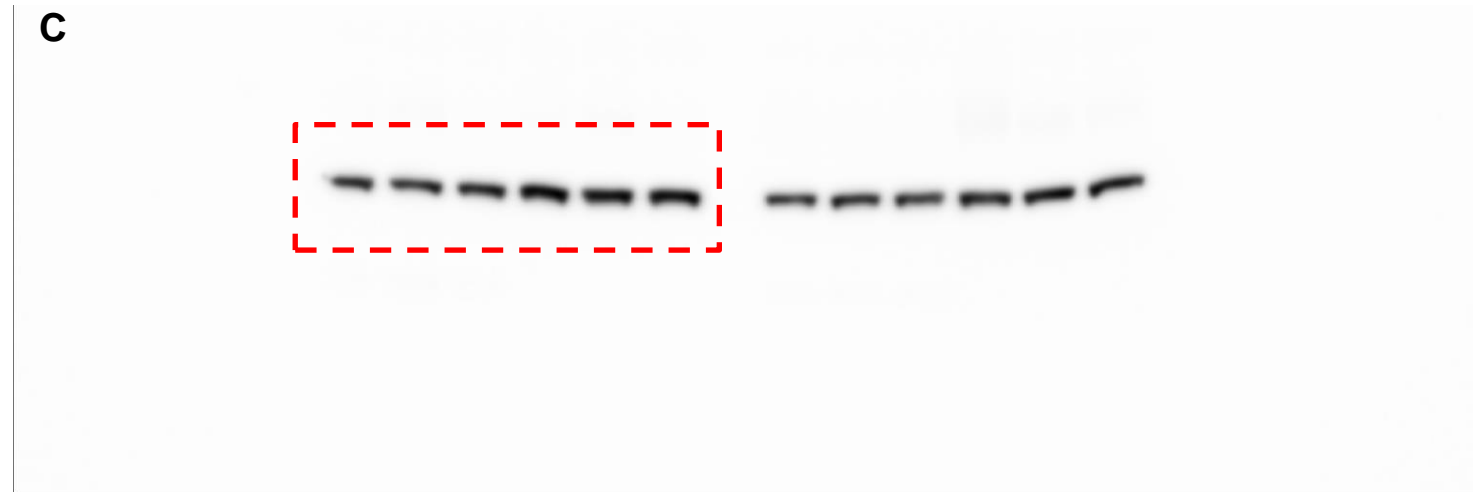

**A**

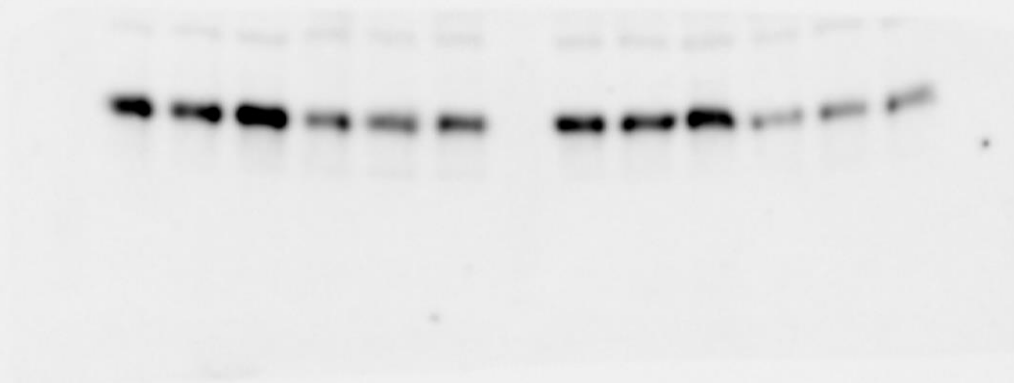

**B**

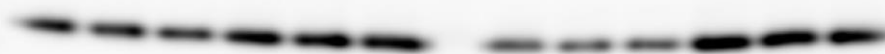

**C**

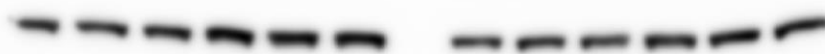

Supplement: supp [file elife-84710-supp-v1.zip]
